# Supplementary material for: Dendritic Cu: a high-efficiency electrocatalyst for N2 fixation to NH3 under ambient conditions
Source: Royal Society of Chemistry journal article supplement (doi:10.1039/c9cc08234d), 2019-01-01
Supplement: c9cc08234d1.pdf [file c9cc08234d1.pdf]

## Electronic Supplementary Information

### Experimental

**Materials:** Copper (II) sulfate pentahydrate ( $\text{CuSO}_4 \cdot 5\text{H}_2\text{O}$ ), sodium nitroferricyanide dihydrate ( $\text{C}_5\text{FeN}_6\text{Na}_2\text{O} \cdot 2\text{H}_2\text{O}$ ), sodium citrate ( $\text{Na}_3\text{C}_6\text{H}_5\text{O}_7 \cdot 2\text{H}_2\text{O}$ ), para-(dimethylamino) benzaldehyde ( $p\text{-C}_9\text{H}_{11}\text{NO}$ ), and salicylic acid ( $\text{C}_7\text{H}_6\text{O}_3$ ) were purchased from Aladdin Ltd, Shanghai, China. Nafion (5 wt%) solution was purchased from Sigma-Aldrich Chemical Reagent Co., Ltd. Hydrochloric acid (HCl), sodium hydroxide (NaOH), Sulfuric acid ( $\text{H}_2\text{SO}_4$ ), nitric acid ( $\text{HNO}_3$ ), and ethyl alcohol ( $\text{C}_2\text{H}_5\text{OH}$ ) were purchased from Chengdu Kelong Chemical Reagent Factory, China. Hypochlorite solution ( $\text{NaClO}$ ), ammonium chloride ( $\text{NH}_4\text{Cl}$ ), hydrazine monohydrate ( $\text{N}_2\text{H}_4 \cdot \text{H}_2\text{O}$ ), carbon paper (CP; TGP-H-060), and Zn foil (99.99%) were purchased from Beijing Chemical Corp, China. High-purity  $\text{N}_2$  (99.999%) and Ar (99.999%) were purchased from Chengdu Xuyuan Chemical Co., Ltd, China. The ultrapure water used throughout all experiments was purified through a Millipore system. All reagents were analytical reagent grade without further purification.

**Synthesis dendritic Cu:** The synthesis for dendritic Cu, Zn foil was successively cleaned by acetone, deionized water and ethanol. Then, 600 mM  $\text{CuSO}_4$  aqueous solution was prepared. The product was made by immersing Zn foil into the  $\text{CuSO}_4$  solution for 8 min, then remove the surplus Zn foil completely, and getting the powder was washed by 0.1 M HCl, deionized water and ethanol, respectively. Finally, vacuum drying for 5 hours under  $50^\circ\text{C}$ .

**Preparation of Cu/CP:** CP was pretreated in 0.05M  $\text{H}_2\text{SO}_4$ , then was sequentially cleaned in deionized water and ethanol several times by sonication to remove the surface impurities. To prepare the Cu/CP, 10 mg dendritic Cu and 40  $\mu\text{L}$  5 wt% Nafion solution were dispersed in 960  $\mu\text{L}$  ethanol followed by 30 min sonication to form a homogeneous ink. 10  $\mu\text{L}$  ink was loaded onto a CP ( $1 \times 1 \text{ cm}^2$ ) and dried under ambient condition. (the dendritic Cu loading:  $0.1 \text{ mg cm}^{-2}$ )

**Characterizations:** X-ray diffraction (XRD) patterns were obtained from a Shimadzu XRD-6100 diffractometer with Cu  $\text{K}\alpha$  radiation (40 kV, 30 mA) of wavelength 0.154

nm (Japan). Scanning electron microscopy (SEM) images were collected on a GeminiSEM 300 scanning electron microscope (ZEISS, Germany) at an accelerating voltage of 10 kV. The structures of the samples were determined by Transmission electron microscopy (TEM) images on a HITACHI H-8100 electron microscopy (Hitachi, Tokyo, Japan) operated at 200 kV. The absorbance data of spectrophotometer were measured on UV-2700 spectrophotometer. The ion chromatography data were collected on Metrohm 940 Professional IC Vario.

**Pretreatment before electrochemical measurement:** Prior to use, all components of the electrochemical cell were soaked in 0.05 M H<sub>2</sub>SO<sub>4</sub> solution for at least 16 h and then washed copiously with deionized water to eliminate any contaminants. Nafion 117 membrane was ultrasonicated in 1 M H<sub>2</sub>SO<sub>4</sub>, and deionized water at 80 °C for 1 h, respectively. Then it was thoroughly rinsed in deionized water several times. All other labware involved in experiments (vials, containers, needles, pipet, etc.) were also washed with 0.1 M H<sub>2</sub>SO<sub>4</sub> and deionized water several times. The N<sub>2</sub> (99.999%) and Ar (99.999%) before entering the cell, they were passed through a saturator filled with 0.05 M H<sub>2</sub>SO<sub>4</sub> to remove any possible contaminants. Likewise, gases exiting the cell were passed through another saturator filled with 0.05 M H<sub>2</sub>SO<sub>4</sub>, which served as an acid trap to capture any generated ammonia. Prior to any electrochemical measurement, we have made sure of the gas tightness of the cells, and saturate the electrolyte and headspace in electrolyser by purging the gas that has been passed through a saturator filled with 0.05 M H<sub>2</sub>SO<sub>4</sub> for at least 30 min.

**Electrochemical measurement:** Electrochemical NRR measurements were performed in a two-compartment cell separated by Nafion 117 membrane using a CHI 660E electrochemical analyzer (CH Instruments, Inc.). The electrochemical experiments were carried out with a three-electrode configuration using graphite rod as the counter electrode and Ag/AgCl/saturated KCl solution as the reference electrode. The working electrode was a CP with catalysis. The potentials reported in this work were converted to reversible hydrogen electrode (RHE) scale via calibration with the following equation:  $E(\text{RHE}) = E(\text{Ag}/\text{AgCl}) + 0.059 \times \text{pH} + 0.197 \text{ V}$  and the

presented current density was normalized to the geometric surface area. For electrochemical N<sub>2</sub> reduction, chrono-amperometry tests were conducted in N<sub>2</sub>-saturated 0.1 M HCl solution (the HCl electrolyte was purged with N<sub>2</sub> for 30 min before the measurement).

**Determination of NH<sub>3</sub>:** Concentration of produced NH<sub>3</sub> was spectrophotometrically determined by the indophenol blue method.<sup>1</sup> Typically, 2 mL electrolyte was taken from the cathodic chamber, and then 2 mL of 1 M NaOH solution containing 5% salicylic acid and 5% sodium citrate was added into this solution. Subsequently, 1 mL of 0.05 M NaClO and 0.2 mL of 1% C<sub>5</sub>FeN<sub>6</sub>Na<sub>2</sub>O·2H<sub>2</sub>O were added into the above solution. After standing at room temperature for 2 h, UV-Vis absorption spectrum was measured at a wavelength of 655 nm. The concentration-absorbance curve was calibrated using the standard NH<sub>4</sub>Cl solution with NH<sub>3</sub> concentrations of 0.0, 0.05, 0.10, 0.15, 0.20, 0.25, and 0.30 μg mL<sup>-1</sup> in 0.1 M HCl. The fitting curve ( $y = 0.356x + 0.051$ ,  $R^2 = 0.999$ ) shows good linear relation of absorbance value with NH<sub>3</sub> concentration by three times independent calibrations.

**Determination of N<sub>2</sub>H<sub>4</sub>:** N<sub>2</sub>H<sub>4</sub> presented in the electrolyte was estimated by the method of Watt and Chrisp.<sup>2</sup> A mixed solution of 5.99 g *p*-C<sub>9</sub>H<sub>11</sub>NO, 30 mL HCl and 300 mL ethanol was used as a color reagent. Calibration curve was plotted as follows: firstly, preparing a series of reference solutions; secondly, adding 5 mL above prepared color reagent and stirring 20 min at room temperature; finally, the absorbance of the resulting solution was measured at 455 nm, and the yields of N<sub>2</sub>H<sub>4</sub> were estimated from a standard curve using 5 mL residual electrolyte and 5 mL color reagent. Absolute calibration of this method was achieved using N<sub>2</sub>H<sub>4</sub>·H<sub>2</sub>O solutions of known concentration as standards, and the fitting curve shows good linear relation of absorbance with N<sub>2</sub>H<sub>4</sub>·H<sub>2</sub>O concentration ( $y = 0.699x + 0.0436$ ,  $R^2 = 0.999$ ) by three times independent calibrations.

**Calculations of NH<sub>3</sub> yield rate and Faradaic efficiency (FE):** The FE for N<sub>2</sub> reduction was defined as the amount of electric charge used for synthesizing NH<sub>3</sub> divided the total charge passed through the electrodes during the electrolysis. The

total amount of  $\text{NH}_3$  produced was measured using colorimetric methods. Assuming three electrons were needed to produce one  $\text{NH}_3$  molecule, the FE could be calculated as follows:

$$\text{FE} = 3 \times F \times [\text{NH}_3] \times V / (17 \times Q)$$

The rate of  $\text{NH}_3$  yield rate ( $V_{\text{NH}_3}$ ) was calculated using the following equation:

$$V_{\text{NH}_3} = [\text{NH}_3] \times V / (m_{\text{cat.}} \times t)$$

The amount of  $\text{NH}_3$  was calculated as follows:

$$m_{\text{NH}_3} = [\text{NH}_3] \times V$$

Where F is the Faraday constant ( $96500 \text{ C mol}^{-1}$ );  $[\text{NH}_3]$  is the measured  $\text{NH}_3$  concentration; V is the volume of the electrolyte in the cathodic chamber (35 ml); Q is the total quantity of applied electricity;  $m_{\text{cat.}}$  is the loaded mass of catalyst on carbon paper (0.1 mg) and t is the reduction time (2 h).

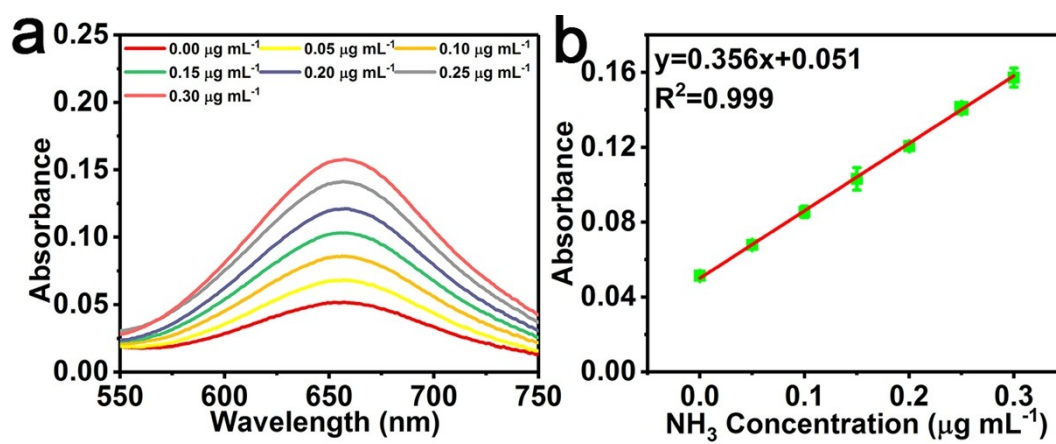

**Fig. S1.** (a) UV-Vis curves of indophenol assays with  $\text{NH}_3$  after incubated for 2 h at room temperature. (b) Calibration curve used for estimation of  $\text{NH}_3$ .

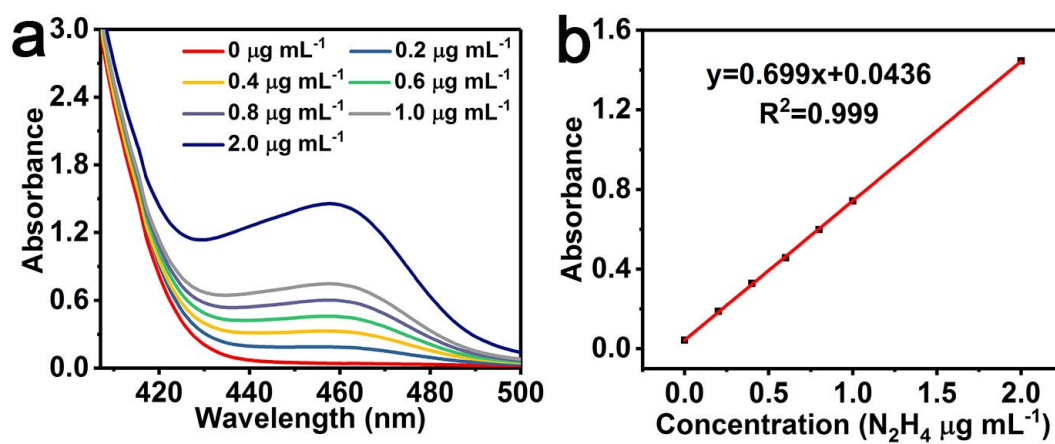

**Fig. S2.** (a) UV-Vis curves of various  $N_2H_4$  concentrations after adding into chemical indicator by the method of Watt. (b) Calibration curve used for calculation of  $N_2H_4$  concentrations.

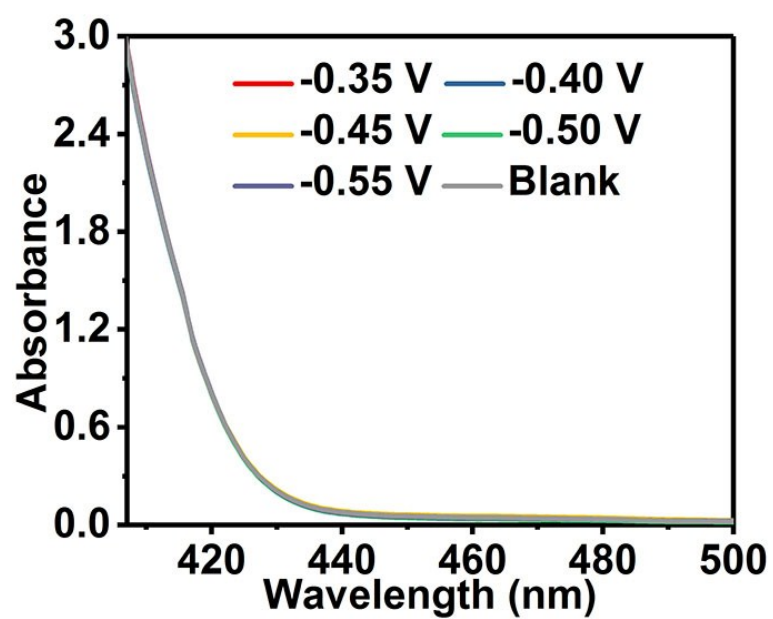

**Fig. S3.** UV-Vis absorption spectra of the electrolytes treated with the method of Watt and Crisp for 20 min after NRR at a series of potentials

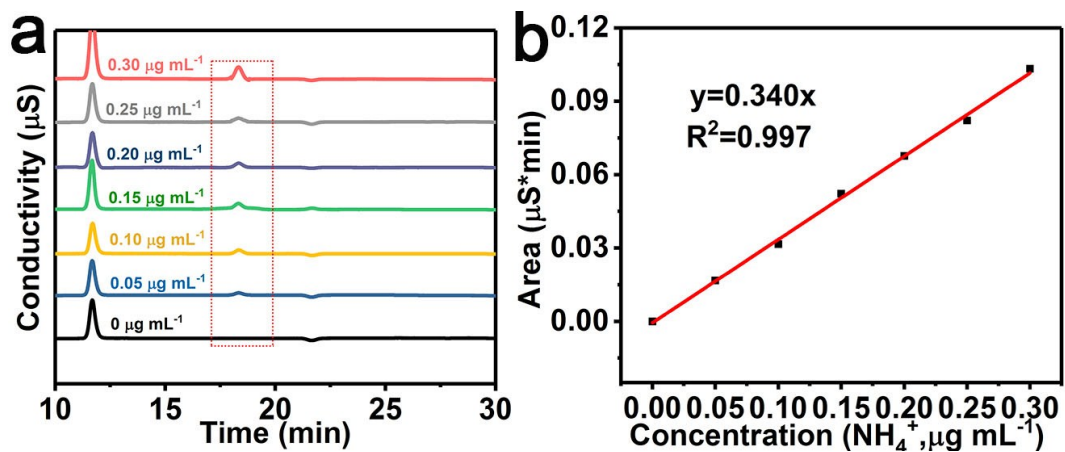

**Fig. S4.** (a) Ion chromatograms of  $\text{NH}_4^+$  with different concentrations in 0.1 M HCl and (b) corresponding standard curve.



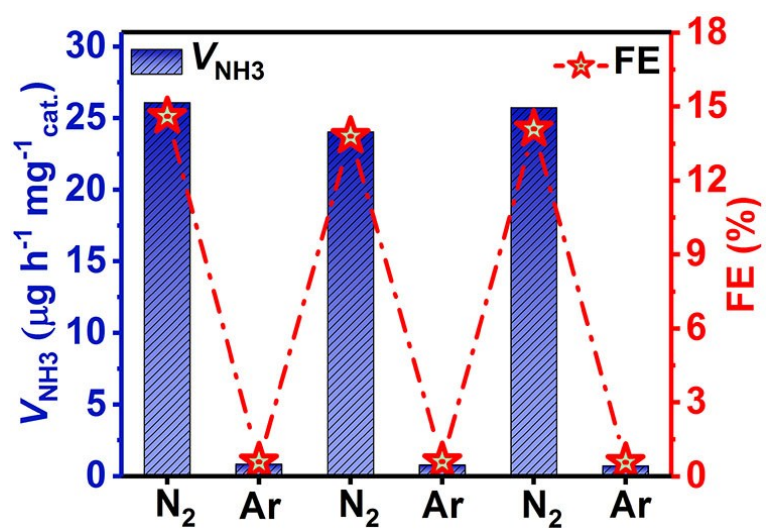

**Fig. S5.**  $V_{\text{NH}_3}$  and FEs for Cu/CP with alternating 2 h cycles between N<sub>2</sub>- and Ar-saturated electrolytes.

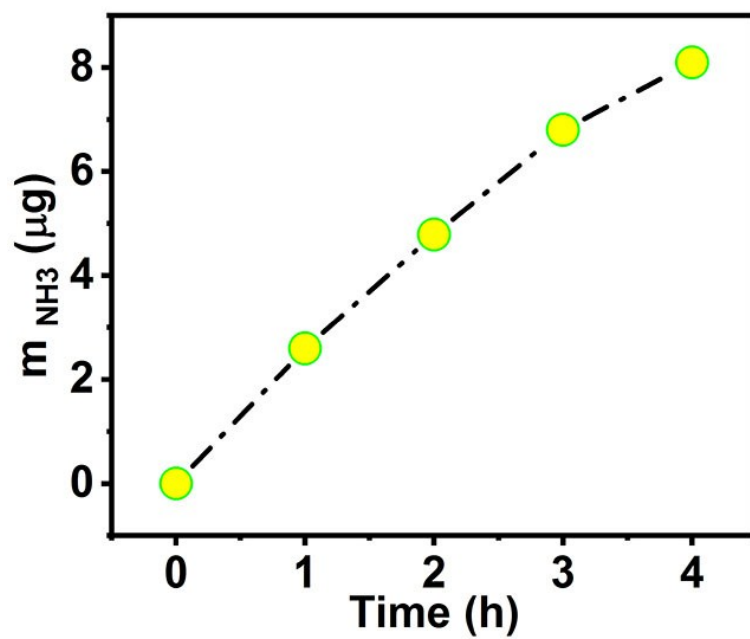

**Fig. S6.** Amount of NH<sub>3</sub> vs. reaction time at -0.40 V using Cu/CP.

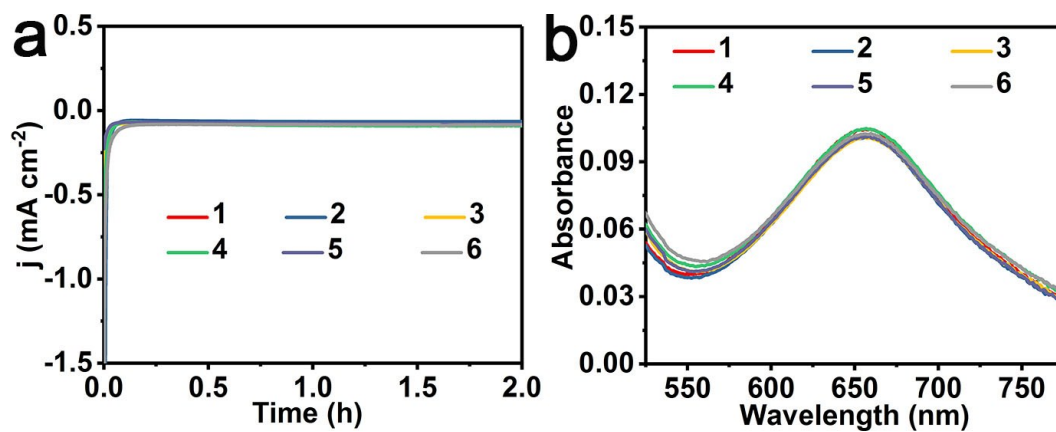

**Fig. S7.** (a) Time-dependent current density curves of Cu/CP electrode at  $-0.40$  V over 6 cycles. (b) UV-Vis absorption spectra of the electrolytes stained with indophenol indicator after 2 h NRR electrolysis at  $-0.40$  V over 6 cycles.

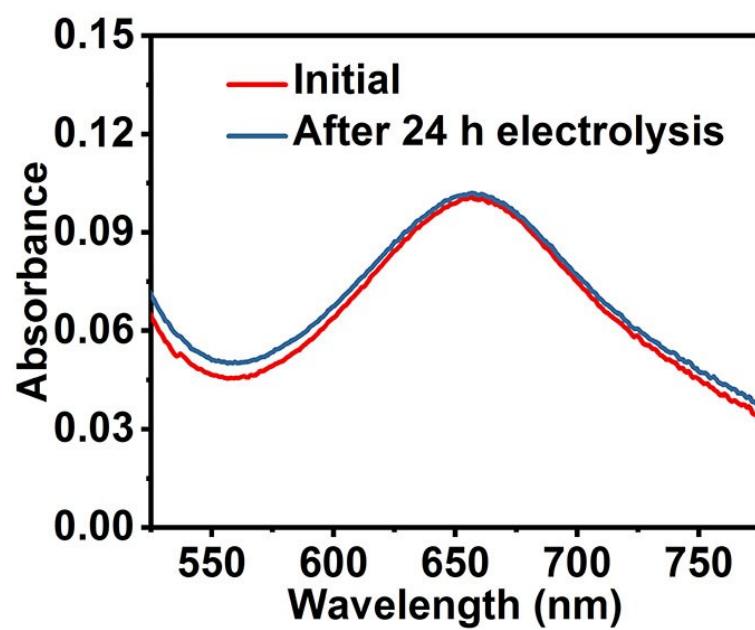

**Fig. S8.** UV-Vis absorption spectra of the electrolytes stained with indophenol indicator at  $-0.40$  V after electrolysis for 2 h with the initial Cu/CP and the Cu/CP after 24 h electrolysis.

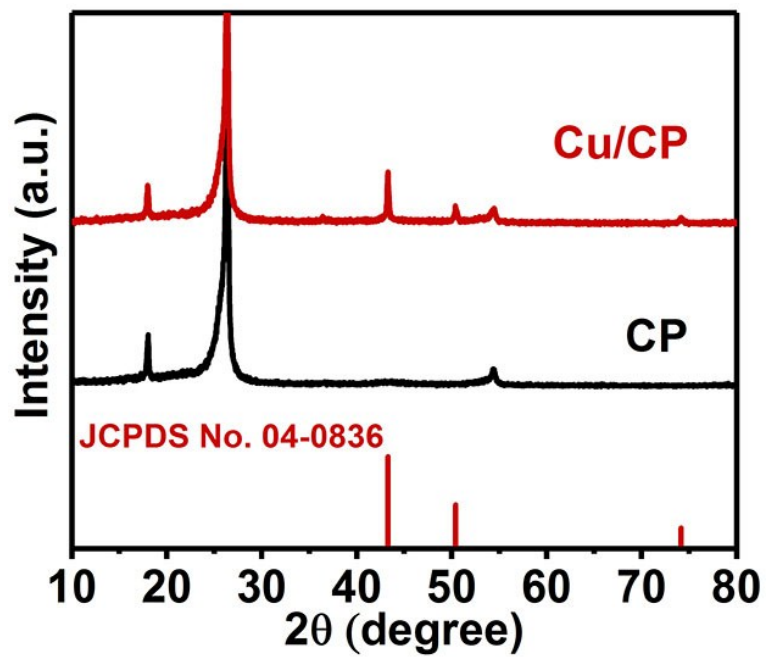

Fig. S9. XRD patterns for Cu/CP and CP after stability test.

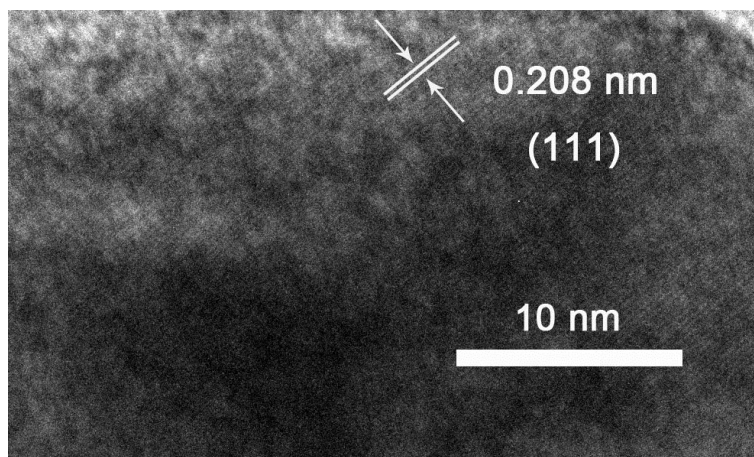

**Fig. S10.** HRTEM image for dendritic Cu after stability test.

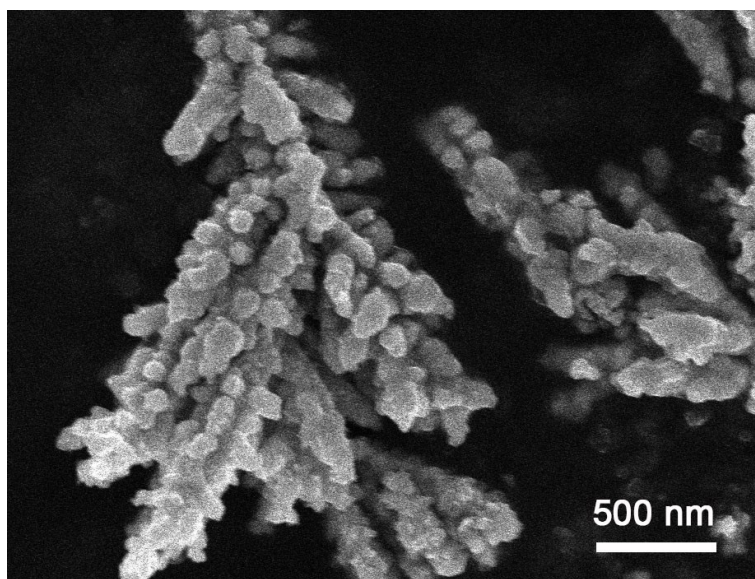

**Fig. S11.** SEM image for dendritic Cu after stability test.

**Table S1.** Comparison of the NH<sub>3</sub> yield rate for dendritic Cu with other electrocatalysts under ambient conditions.

| Catalyst                                                         | Electrolyte      | NH <sub>3</sub> yield rate                                                | Ref.             |
|------------------------------------------------------------------|------------------|---------------------------------------------------------------------------|------------------|
| Dendritic Cu                                                     | <b>0.1 M HCl</b> | <b>25.63 <math>\mu\text{g h}^{-1} \text{mg}^{-1}_{\text{cat.}}</math></b> | <b>This work</b> |
| TiC/C nanofiber                                                  | 0.1 M HCl        | 14.1 $\mu\text{g h}^{-1} \text{mg}^{-1}_{\text{cat.}}$                    | 3                |
| LiMn <sub>2</sub> O <sub>4</sub> NF/CP                           | 0.1 M HCl        | 15.83 $\mu\text{g h}^{-1} \text{mg}^{-1}_{\text{cat.}}$                   | 4                |
| PTCA-rGO                                                         | 0.1 M HCl        | 24.7 $\mu\text{g h}^{-1} \text{mg}^{-1}_{\text{cat.}}$                    | 5                |
| oxygen-doped graphene                                            | 0.1 M HCl        | 21.3 $\mu\text{g h}^{-1} \text{mg}^{-1}_{\text{cat.}}$                    | 6                |
| La <sub>2</sub> Ti <sub>2</sub> O <sub>7</sub> nanosheet         | 0.1 M HCl        | 25.15 $\mu\text{g h}^{-1} \text{mg}^{-1}_{\text{cat.}}$                   | 7                |
| Au flowers                                                       | 0.1 M HCl        | 25.57 $\mu\text{g h}^{-1} \text{mg}^{-1}_{\text{cat.}}$                   | 8                |
| N-doped porous carbon                                            | 0.1 M HCl        | 15.7 $\mu\text{g h}^{-1} \text{mg}^{-1}_{\text{cat.}}$                    | 9                |
| Ti <sub>3</sub> C <sub>2</sub> T <sub>x</sub> nanosheet          | 0.1 M HCl        | 20.4 $\mu\text{g h}^{-1} \text{mg}^{-1}_{\text{cat.}}$                    | 10               |
| PCN                                                              | 0.1 M HCl        | 8.09 $\mu\text{g h}^{-1} \text{mg}^{-1}_{\text{cat.}}$                    | 11               |
| $\alpha$ -Au/CeO <sub>x</sub> -RGO                               | 0.1 M HCl        | 8.31 $\mu\text{g h}^{-1} \text{mg}^{-1}_{\text{cat.}}$                    | 12               |
| Bi <sub>4</sub> V <sub>2</sub> O <sub>11</sub> /CeO <sub>2</sub> | 0.1 M HCl        | 23.21 $\mu\text{g h}^{-1} \text{mg}^{-1}_{\text{cat.}}$                   | 13               |
| NPC                                                              | 0.1 M HCl        | 0.97 $\mu\text{g h}^{-1} \text{mg}^{-1}_{\text{cat.}}$                    | 14               |
| Ag nanosheets                                                    | 0.1 M HCl        | 2.83 $\mu\text{g h}^{-1} \text{mg}^{-1}_{\text{cat.}}$                    | 15               |
| Au/TiO <sub>2</sub>                                              | 0.1 M HCl        | 21.4 $\mu\text{g h}^{-1} \text{mg}^{-1}_{\text{cat.}}$                    | 16               |



**Table S2.** Comparison of the FE for dendritic Cu with other electrocatalysts under ambient conditions.

| Catalyst                                                         | Electrolyte      | FE (%)       | Ref.             |
|------------------------------------------------------------------|------------------|--------------|------------------|
| <b>Dendritic Cu</b>                                              | <b>0.1 M HCl</b> | <b>15.12</b> | <b>This work</b> |
| TiC/C nanofiber                                                  | 0.1 M HCl        | 5.8          | 3                |
| LiMn <sub>2</sub> O <sub>4</sub> NF/CP                           | 0.1 M HCl        | 7.44         | 4                |
| PTCA-rGO                                                         | 0.1 M HCl        | 6.9          | 5                |
| oxygen-doped graphene                                            | 0.1 M HCl        | 12.6         | 6                |
| La <sub>2</sub> Ti <sub>2</sub> O <sub>7</sub> nanosheet         | 0.1 M HCl        | 5.87         | 7                |
| Au flowers                                                       | 0.1 M HCl        | 6.05         | 8                |
| N-doped porous carbon                                            | 0.1 M HCl        | 1.45         | 9                |
| Ti <sub>3</sub> C <sub>2</sub> T <sub>x</sub> nanosheet          | 0.1 M HCl        | 9.3          | 10               |
| PCN                                                              | 0.1 M HCl        | 11.59        | 11               |
| $\alpha$ -Au/CeO <sub>x</sub> -RGO                               | 0.1 M HCl        | 10.10        | 12               |
| Bi <sub>4</sub> V <sub>2</sub> O <sub>11</sub> /CeO <sub>2</sub> | 0.1 M HCl        | 10.16        | 13               |
| NPC                                                              | 0.1 M HCl        | 4.2          | 14               |
| Ag nanosheets                                                    | 0.1 M HCl        | 4.8          | 15               |
| Nb <sub>2</sub> O <sub>5</sub> nanofiber                         | 0.1 M HCl        | 9.26         | 17               |
| Mo <sub>2</sub> N nanorod                                        | 0.1 M HCl        | 4.5          | 18               |
| Fe <sub>3</sub> S <sub>4</sub> nanosheets                        | 0.1 M HCl        | 6.45         | 19               |
| VN nanosheet array                                               | 0.1 M HCl        | 2.25         | 20               |

## References

- 1 D. Zhu, L. Zhang, R. E. Ruther and R. J. Hamers, *Nat. Mater.*, 2013, **12**, 836–841.
- 2 G. W. Watt and J. D. Chrisp, *Anal. Chem.*, 1952, **24**, 2006–2008.
- 3 G. Yu, H. Guo, W. Kong, T. Wang, Y. Luo, X. Shi, A. M. Asiri, T. Li and X. Sun, *J. Mater. Chem. A*, 2019, **7**, 19657–19661.
- 4 C. Li, J. Yu, L. Yang, J. Zhao, W. Kong, T. Wang, A. M. Asiri, Q. Li and X. Sun, *Inorg. Chem.*, 2019, **58**, 9597–9601.
- 5 P. Li, J. Wang, H. Chen, X. Sun, J. You, S. Liu, Y. Zhang, M. Liu, X. Niu and Y. Luo, *J. Mater. Chem. A*, 2019, **7**, 12446–12450.
- 6 T. Wang, L. Xia, J. Yang, H. Wang, W. Fang, H. Chen, D. Tang, A. M. Asiri, Y. Luo, G. Cui and X. Sun, *Chem. Commun.*, 2019, **55**, 7502–7505.
- 7 J. Yu, C. Li, B. Li, X. Zhu, R. Zhang, L. Ji, D. Tang, A. M. Asiri, X. Sun, Q. Li, S. Liu and Y. Luo, *Chem. Commun.*, 2019, **55**, 6401–6404.
- 8 Z. Wang, Y. Li, H. Yu, Y. Yu, H. Xue, X. Li, H. Wang and L. Wang, *ChemSusChem*, 2018, **11**, 3480–3485.
- 9 X. Yang, K. Li, D. Cheng, W. Pang, J. Lv, X. Chen, H. Zang, X. Wu, H. Tan, Y. Wang and Y. Li, *J. Mater. Chem. A*, 2018, **6**, 7762–7769.
- 10 J. Zhao, L. Zhang, X. Xie, X. Li, Y. Yong, Q. Liu, W. Fang, X. Shi, G. Cui and X. Sun, *J. Mater. Chem. A*, 2018, **6**, 24031–24035.
- 11 C. Lv, Y. Qian, C. Yan, Y. Ding, Y. Liu, G. Chen and G. Yu, *Angew. Chem. Int. Ed.*, 2018, **57**, 10246–10250.
- 12 S. Li, D. Bao, M. Shi, B. Wulan, J. Yan and Q. Jiang, *Adv. Mater.*, 2017, **29**, 1700001.
- 13 C. Lv, C. Yan, G. Chen, Y. Ding, J. Sun, Y. Zhou and G. Yu, *Angew. Chem., Int. Ed.*, 2018, **57**, 6073–6076.
- 14 P. Song, H. Wang, L. Kang, B. Ran, H. Song and R. Wang, *Chem. Commun.*, 2019, **55**, 687–690.
- 15 H. Huang, L. Xia, X. Shi, A. M. Asiri and X. Sun, *Chem. Commun.*, 2018, **54**, 11427–11430.

- 16 M. Shi, D. Bao, B. R. Wulan, Y. H. Li, Y. F. Zhang, J. M. Yan and Q. Jiang, *Adv. Mater.*, 2017, **29**, 1606550.
- 17 J. Han, Z. Liu, Y. Ma, G. Cui, F. Xie, F. Wang, Y. Wu, S. Gao, Y. Xu and X. Sun, *Nano Energy*, 2018, **52**, 264–270.
- 18 X. Ren, G. Cui, L. Chen, F. Xie, Q. Wei, Z. Tian and X. Sun, *Chem. Commun.*, 2018, **54**, 8474–8477.
- 19 X. Zhao, X. Lan, D. Yu, H. Fu, Z. Liu and T. Mu, *Chem. Commun.*, 2018, **54**, 13010–13013.
- 20 R. Zhang, Y. Zhang, X. Ren, G. Cui, A. M. Asiri, B. Zheng and X. Sun, *ACS Sustainable Chem. Eng.*, 2018, **6**, 9545–9549.
